# Supplementary material
Source: MDPI journal article supplement (https://www.mdpi.com/2304-6732/9/7/481)
Supplement: s1 [file s1 › photonics-1778150-supplementary.pdf]

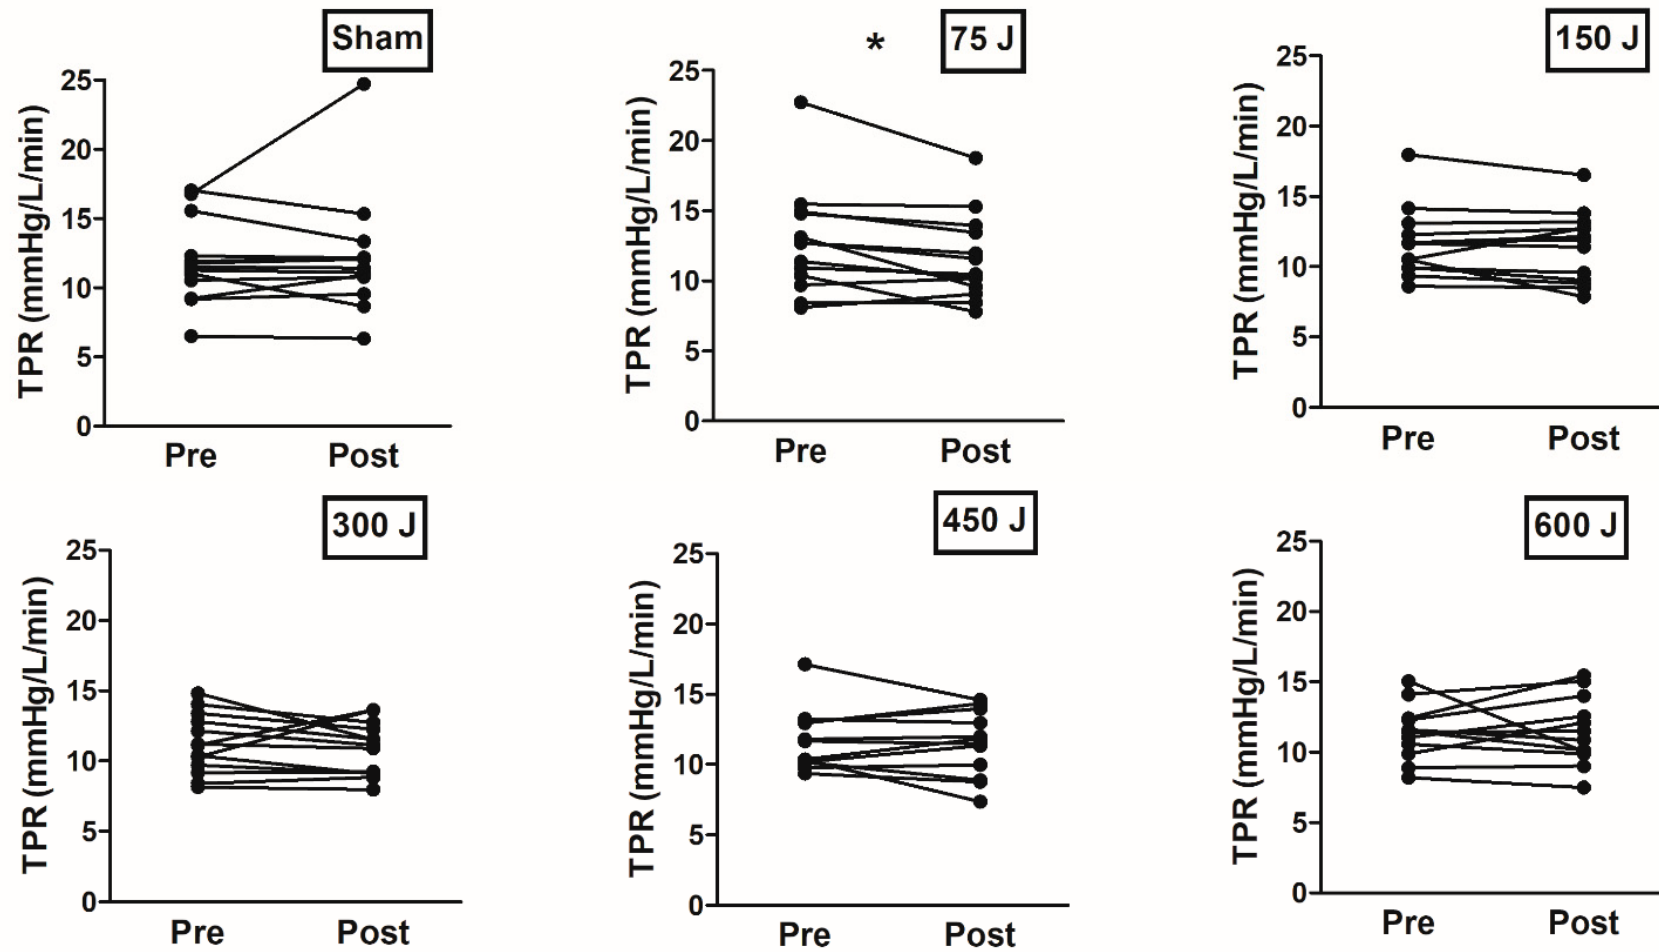

**Figure S1.** Individual response of total peripheral vascular resistance (TPR) (mmHg/L/min) pre and 15 min post experimental protocol for each energy, sham, 75, 150, 300, 450 and 600 J.  
 \*:  $p < 0.05$  when compared to the baseline.
